# Supplementary material
Source: PubMed Central journal article supplement (PMC3325589)
Supplement: supp_M111.304899_jbc.M111.304899-1.pdf [file supp_M111.304899_jbc.M111.304899-1.pdf]

## FRAP model of nucleocytoplasmic translocation applied to nuclear export

As stated in the main text, the passive diffusion fluxes are expressed by:

$$J_p^{C \rightarrow N} = P_{NES} C_{NES}^C \quad (S1)$$

$$J_p^{N \rightarrow C} = P_{NES} \chi_{NES}^N C_{NES}^N \quad (S2)$$

where  $J_p^{C \rightarrow N}$  and  $J_p^{N \rightarrow C}$  are the passive fluxes,  $P_{NES}$  is the *permeability coefficient* of the NE for free NES-GFP,  $C_{NES}^C$  and  $C_{NES}^N$  are the average concentrations of the entire NES-GFP pool in cytoplasm and nucleus, and  $\chi_{NES}^N$  is the molar fraction of NES-GFP pool not engaged in a complex with the exportins in nucleus, respectively.

The active export flux is instead given by:

$$J_a^{N \rightarrow C} = v_{NES}^{N \rightarrow C} (1 - \chi_{NES}^N) C_{NES}^N \quad (S3)$$

$v_{NES}^{N \rightarrow C}$  represents the first order rate constant of active export. At steady state:

$$J_p^{C \rightarrow N} + J_p^{N \rightarrow C} + J_c^{N \rightarrow C} = 0 \quad (S4)$$

If we define:

$$K_{eq} = \frac{C_{NES}^N}{C_{NES}^C} \quad (S5)$$

we obtain from S1-S3:

$$K_{eq} = \frac{P_{NES}}{v_{NES}^{N \rightarrow C} (1 - \chi_{NES}^N) + P_{NES} \chi_{NES}^N} \quad (S6)$$

We now define the *excess active flux* of the exported cargo  $\Phi^{N \rightarrow C}$  as:

$$\Phi^{N \rightarrow C} = P_{NES} \left( \frac{1}{K_{eq}} - 1 \right) C_{NES}^N \quad (S7)$$

$\Phi^{N \rightarrow C}$  is an experimentally measurable parameter and it corresponds to the global N→C flux (passive+active) minus the theoretical passive N→C flux of NES-GFP in absence of exportin. As stated in the main text and reported in (1)  $\Phi^{N \rightarrow C}$  can be computed from the monexponential fitting parameters of recovered FRAP curves and the nuclear radius. By combining S6 and S7, we get the fundamental equation of our model:

$$\Phi^{N \rightarrow C} = (v_{NES}^{N \rightarrow C} - P_{NES}) (1 - \chi_{NES}^N) C_{NES}^N \quad (S8)$$

For very large  $C_{NES}^N$ , the product  $(1 - \chi_{NES}^N) C_{NES}^N$  converges to  $C_{Ex}^N$ , i.e. all the exportin receptor is saturated. We always found out  $v_{NES}^{N \rightarrow C} \gg P_{NES}$  (see below), and eq. S8 becomes in this limit:

$$\Phi^{N \rightarrow C} \approx v_{NES}^{N \rightarrow C} C_{Ex}^N = V_m^{N \rightarrow C} \quad \text{for } C_{NES}^N \rightarrow \infty \quad (S9)$$

$V_m^{N \rightarrow C}$  is the *truly intrinsic dynamic parameter of nuclear export*, because it quantifies the translocation efficiency, in terms of exported molecule per second, of the exportin-NES complex through the NPC.

When the exportins are not fully saturated by NES ( $\chi_{NES}^N > 0$ ),  $\Phi^{N \rightarrow C}$  is a function of  $C_{NES}^N$ . Indeed,  $\chi_{NES}^N$  is connected to  $C_{NES}^N$  through the mass action law together with the mass conservation balance. The simplest case occurs when a 1:1 complex is formed; we have:

$$1 - \chi_{\text{NES}}^{\text{N}} = \frac{\beta - (\beta^2 - 4C_{\text{NES}}^{\text{N}} C_{\text{Ex}}^{\text{N}})^{0.5}}{2C_{\text{NES}}^{\text{N}}} \quad (\text{S10})$$

where  $\beta = (C_{\text{NES}}^{\text{N}} + C_{\text{Ex}}^{\text{N}} + K_{\text{D}}^*)$ ,  $C_{\text{Ex}}^{\text{N}}$  is the global nuclear concentration of exportin and  $K_{\text{D}}^*$  is the intranuclear dissociation constant of the NES-GFP·Ex complex (the asterisk denotes that the dissociation constant is in principle different from the actual binding constant measured *in vitro* owing to the intranuclear environment: see main text for further discussion on this point).

If a reasonable estimate of  $C_{\text{Ex}}^{\text{N}}$  is assumed, fitting of experimental  $\Phi^{\text{N} \rightarrow \text{C}}$  vs.  $C_{\text{NES}}^{\text{N}}$  curve to eq. S8 and S10 yields both  $V_{\text{m}}^{\text{N} \rightarrow \text{C}}$  and  $K_{\text{D}}^*$ . Accordingly, the thermodynamic as well as the kinetic features of the active export can be fully identified. It is worth noting that we always assumed  $C_{\text{Ex}}^{\text{N}} = [\text{CRM1}]_{\text{N}} = 0.3 \mu\text{M}$  after Riddick et al. (2). Note that  $C_{\text{Ex}}^{\text{N}} = 0.3 \mu\text{M}$  leads to  $v_{\text{NES}}^{\text{N} \rightarrow \text{C}} = 620 \pm 145 \mu\text{m}^3/\text{s}$ , a much higher value than  $P_{\text{NES}}$  ( $\bar{P}_{\text{NES}} = 9.5 \pm 5 \mu\text{m}^3/\text{s}$ ), thus justifying the assumption underlying eq. S9.

1. Cardarelli, F., Bizzarri, R., Serresi, M., Albertazzi, L., and Beltram, F. (2009) *J Biol Chem* **284**, 36638-36646
2. Riddick, G., and Macara, I. G. (2007) *Mol Syst Biol* **3**, 118
